# Supplementary material
Source: Royal Society of Chemistry journal article supplement (doi:10.1039/d6gc00941g)
Supplement: d6gc00941g1.pdf [file d6gc00941g1.pdf]

Supplementary Information

**Efficient Preparation of Battery-Grade  $\text{Li}_2\text{CO}_3$  from Spent Battery  
Leachate via Integrated Solvent Extraction and Direct Precipitation**

Qiyuan Zheng<sup>a,b,\*</sup>, Yanbin Yang<sup>a,b</sup>, Wanting Xu<sup>a,b</sup>, Jun Peng<sup>a</sup>, and Guiqing Zhang<sup>b</sup>

<sup>a</sup> Changsha Research Institute of Mining and Metallurgy Co., LTD, Changsha 410012,  
Hunan, P. R. China

<sup>b</sup> School of Metallurgy and Environment, Central South University, Changsha,  
410083, P.R. China

E-mail address of corresponding authors:

qiyuanzheng@csu.edu.cn (Qiyuan Zheng);

Postal addresses: No.966 South Lushan Road, Changsha Hunan 410083 P.R. China

**Table S1.** The content of major elements in the raw material solution (mg/L)

|         |        |       |         |         |             |             |
|---------|--------|-------|---------|---------|-------------|-------------|
| Element | Ca     | Co    | Li      | Na      | Mg          | Mn          |
| Content | 371.49 | 36.71 | 2485.89 | 20904.3 | 202.94      | 30.92       |
| Element | Ni     | B     | $F^-$   | $Cl^-$  | $SO_4^{2-}$ | $CO_3^{2-}$ |
| Content | 139.8  | 25.31 | 84.79   | 604.34  | 50187.9     | 3066.73     |

**Table S2.** Separation coefficients for  $\beta_{Me/Li}$  (Me = Ca, Co, Mg, Mn and Ni)

| Equilibrium pH | $\beta_{Ca/Li}$ | $\beta_{Co/Li}$ | $\beta_{Mg/Li}$ | $\beta_{Mn/Li}$ | $\beta_{Ni/Li}$ |
|----------------|-----------------|-----------------|-----------------|-----------------|-----------------|
| 6.50           | 560.78          | 1748.85         | 252.90          | 12992.02        | 18.99           |
| 6.70           | 2063.53         | 2516.59         | 427.95          | 25428.02        | 50.33           |
| 7.00           | 1420.04         | 2127.98         | 367.50          | 20913.97        | 73.96           |
| 7.40           | 900.96          | 1356.64         | 302.09          | 10917.26        | 76.07           |

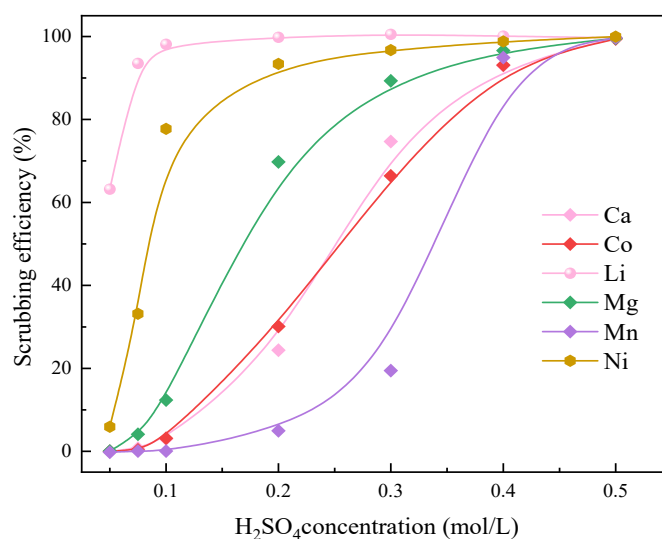

**Fig.S1.** Effect of  $H_2SO_4$  concentration on the scrubbing efficiency of Ca, Co, Li, Mg, Mn, and Ni (O/A ratio: 6:1, t: 10 min, T: 20°C)

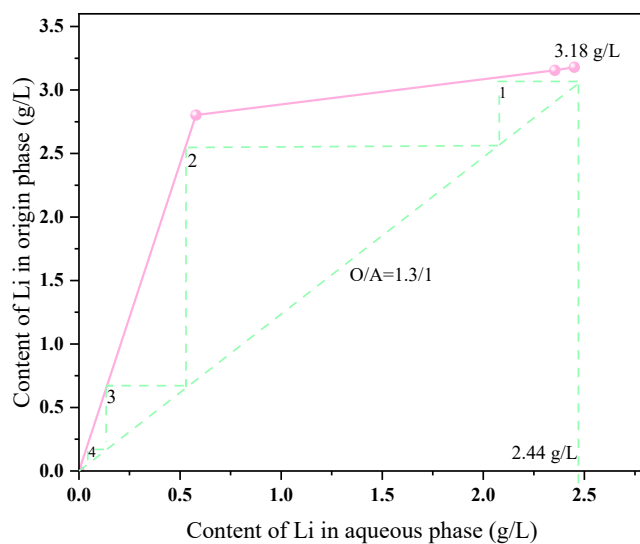

**Fig. S2.** McCabe-Thiele diagram for Li extraction

**Table S3.** Experimental results of Three-stage countercurrent extraction

| Row | Raffinate (mg/L) |      |         |      |      |      | Extraction efficiency (%) |      |      |      |      |      | pHe  |
|-----|------------------|------|---------|------|------|------|---------------------------|------|------|------|------|------|------|
|     | Ca               | Co   | Li      | Mg   | Mn   | Ni   | Ca                        | Co   | Li   | Mg   | Mn   | Ni   |      |
| R6  | ≤0.5             | 0.84 | 2394.81 | ≤0.5 | ≤0.5 | 0.63 | 99.6                      | 99.4 | 3.66 | 99.9 | 99.9 | 99.5 | 7.08 |
| R7  | ≤0.5             | 0.65 | 2416.63 | ≤0.5 | ≤0.5 | 0.58 | 99.9                      | 99.6 | 2.77 | 99.9 | 99.9 | 99.6 | 7.06 |
| R8  | ≤0.5             | ≤0.5 | 2430.00 | ≤0.5 | ≤0.5 | ≤0.5 | 99.9                      | 99.8 | 2.21 | 99.9 | 99.9 | 99.9 | 7.01 |

**Table S4.** Experimental results of multi-stage simulation experiment

| Process    | Metal concentration /(mg/L)   |         |        |         |         |        |        |
|------------|-------------------------------|---------|--------|---------|---------|--------|--------|
|            | Ca                            | Co      | Li     | Mg      | Mn      | Ni     |        |
| Extraction | raffinate                     | <0.5    | <0.5   | 2430.01 | <0.5    | <0.5   | <0.5   |
|            | loaded organic phase          | 371.13  | 36.71  | 86.84   | 202.76  | 30.91  | 139.72 |
| Scrubbing  | scrubbing solution            | 14.07   | 0.32   | 497.32  | 28.77   | 0.20   | 276.29 |
|            | organic phase after scrubbing | 368.78  | 36.66  | 3.95    | 197.97  | 30.88  | 93.67  |
| Stripping  | stripping solution            | 2212.27 | 219.85 | 23.70   | 1186.98 | 185.10 | 561.62 |

**Table S5.** The content of metal and non-metal ions (mg/L)

| Element | Ca   | Co   | Li   | Na    | Mg   | Mn   | Ni   | B     | F <sup>-</sup> | Cl <sup>-</sup> | SO <sub>4</sub> <sup>2-</sup> | CO <sub>3</sub> <sup>2-</sup> |
|---------|------|------|------|-------|------|------|------|-------|----------------|-----------------|-------------------------------|-------------------------------|
| Content | ≤0.5 | ≤0.5 | 2430 | 42476 | ≤0.5 | ≤0.5 | ≤0.5 | 21.16 | 70.55          | 529.98          | 40150.21                      | 2396.01                       |

**Table S6.** Experimental results of four-stage countercurrent extraction

| Row | Raffinate (mg/L) |          | Extraction efficiency (%) |      |
|-----|------------------|----------|---------------------------|------|
|     | Li               | Na       | Li                        | Na   |
| 8   | 0.82             | 47688.99 | 99.9                      | 1.33 |
| 9   | 0.73             | 47426.90 | 99.9                      | 1.40 |
| 10  | ≤0.5             | 47352.89 | >99.9                     | 1.40 |

**Table S7.** Experimental results of five-stage countercurrent scrubbing

| Row | Scrubbing solution (mg/L) |         |      |       |        | Scrubbing efficiency (%) |       |       |       |        |
|-----|---------------------------|---------|------|-------|--------|--------------------------|-------|-------|-------|--------|
|     | Li                        | Na      | B    | $F^-$ | $Cl^-$ | Li                       | Na    | B     | $F^-$ | $Cl^-$ |
| 10  | 2804.51                   | 6290.32 | 1.83 | 5.85  | 38.78  | 4.21                     | >99.9 | >99.9 | >99.9 | >99.9  |
| 11  | 2821.79                   | 6141.08 | 1.81 | 5.93  | 39.47  | 4.66                     | >99.9 | >99.9 | >99.9 | >99.9  |
| 12  | 2867.69                   | 6291.57 | 1.84 | 5.92  | 38.55  | 4.85                     | >99.9 | >99.9 | >99.9 | >99.9  |

**Table S8.** Experimental results of two-stage countercurrent stripping

| Row | Stripping solution (mg/L) |       | Stripping efficiency (%) |       |
|-----|---------------------------|-------|--------------------------|-------|
|     | Li                        | Na    | Li                       | Na    |
| 4   | 31963.44                  | 42.29 | >99.9                    | >99.9 |
| 5   | 32096.87                  | 47.45 | >99.9                    | >99.9 |
| 6   | 31871.09                  | 48.02 | >99.9                    | >99.9 |

**Table S9.** Chemical composition in the stripping solution (mg/L)

| Element  | Ca   | Co   | Li       | Na     | Mg   | Mn   | Ni   | B    | $F^-$ | $Cl^-$ | $SO_4^{2-}$ | $CO_3^{2-}$ |
|----------|------|------|----------|--------|------|------|------|------|-------|--------|-------------|-------------|
| Sample-1 | ≤0.5 | ≤0.5 | 31962.49 | 419.27 | ≤0.5 | ≤0.5 | ≤0.5 | ≤0.5 | ≤0.5  | ≤0.5   | 180224.78   | ≤0.5        |
| Sample-2 | ≤0.5 | ≤0.5 | 32099.01 | 406.59 | ≤0.5 | ≤0.5 | ≤0.5 | ≤0.5 | ≤0.5  | ≤0.5   | 180477.13   | ≤0.5        |
| Sample-3 | ≤0.5 | ≤0.5 | 31871.98 | 418.05 | ≤0.5 | ≤0.5 | ≤0.5 | ≤0.5 | ≤0.5  | ≤0.5   | 180393.08   | ≤0.5        |

**Table S10.** Comparison of the synthesized  $Li_2CO_3$  with the battery-grade standard (YS/T 582-2023).

| YS/T 582-2023<br>Mass fraction (%) | $Li_2CO_3$ -D1 | $Li_2CO_3$ -D2 | $Li_2CO_3$ -D3 | $Li_2CO_3$ product |
|------------------------------------|----------------|----------------|----------------|--------------------|
| $Li_2CO_3$                         | ≥99.5%         | ≥99.5%         | ≥99.5%         | 99.7%              |
| Na                                 | ≤0.005         | ≤0.020         | ≤0.025         | ≤0.020             |
| Mg                                 | ≤0.001         | ≤0.005         | ≤0.008         | ≤0.005             |
| Ca                                 | ≤0.002         | ≤0.005         | ≤0.008         | ≤0.005             |
| K                                  | ≤0.001         | ≤0.005         | ≤0.010         | ≤0.005             |
| Fe                                 | ≤0.0005        | ≤0.0010        | ≤0.0020        | ≤0.0020            |
| Zn                                 | ≤0.0001        | ≤0.0003        | ≤0.0005        | ≤0.0001            |
| Cu                                 | ≤0.0001        | ≤0.0003        | ≤0.0005        | ≤0.0001            |
| Pb                                 | ≤0.0001        | ≤0.0003        | ≤0.0005        | ≤0.0001            |
| Si                                 | ≤0.002         | ≤0.003         | ≤0.005         | ≤0.002             |
| Al                                 | ≤0.0005        | ≤0.0010        | ≤0.0020        | ≤0.0005            |
| Mn                                 | ≤0.0001        | ≤0.0003        | ≤0.0005        | ≤0.0001            |
| Ni                                 | ≤0.0001        | ≤0.0003        | ≤0.0005        | ≤0.0001            |
| B                                  | ≤0.001         | ≤0.003         | ≤0.005         | ≤0.001             |
| $SO_4^{2-}$                        | ≤0.04          | ≤0.07          | ≤0.08          | ≤0.04              |
| $Cl^-$                             | ≤0.002         | ≤0.003         | ≤0.005         | ≤0.003             |

**Table S11.** Experimental conditions for the continuous extraction, scrubbing, stripping, and washing stages

|            | Stage | T (°C) | Time (min) | O/A   | Reagent                        | Concentration |
|------------|-------|--------|------------|-------|--------------------------------|---------------|
| Extraction | 4     | 25     | 5          | 1.5/1 | Feeds/ NaOH                    | /             |
| Scurbbing  | 5     | 25     | 10         | 10/1  | H <sub>2</sub> SO <sub>4</sub> | 0.5 mol/L     |
| Stripping  | 2     | 25     | 10         | 10/1  | H <sub>2</sub> SO <sub>4</sub> | 2.0 mol/L     |
| Washing    | 2     | 25     | 10         | 12/1  | H <sub>2</sub> O               | /             |

**Table S12.** Experimental data of the continuous extraction, scrubbing, and stripping

| Time<br>(h) | Extraction    |         |      |           |          |       |       | Scrubbing                                  |                    |          |       |                                            | Stripping          |           |      |      |
|-------------|---------------|---------|------|-----------|----------|-------|-------|--------------------------------------------|--------------------|----------|-------|--------------------------------------------|--------------------|-----------|------|------|
|             | Flow (mL/min) |         |      | Raffinate |          |       |       | H <sub>2</sub> SO <sub>4</sub><br>(mL/min) | Scrubbing solution |          |       | H <sub>2</sub> SO <sub>4</sub><br>(mL/min) | Stripping solution |           |      |      |
|             | Feed          | Organic | NaOH | Li (mg/L) | Na (g/L) | pH    | TOC   |                                            | Li (g/L)           | Na (g/L) | pH    |                                            | Li (g/L)           | Na (mg/L) | pH   | TOC  |
| 100         | 9.4           | 14.1    | 0.3  | 300.39    | 36.76    | 12.98 | 53.15 | 1.4                                        | 2.28               | 4.32     | 12.65 | 1.4                                        | 24.98              | 73.54     | 2.54 | 6.34 |
| 120         | 9.4           | 14.1    | 0.3  | 280.87    | 36.82    | 12.99 | 56.31 | 1.4                                        | 2.35               | 4.20     | 12.41 | 1.4                                        | 24.08              | 77.98     | 2.62 | 6.84 |
| 140         | 9.4           | 14.1    | 0.3  | 160.06    | 38.01    | 13.02 | 53.12 | 1.4                                        | 2.19               | 4.28     | 12.53 | 1.4                                        | 25.88              | 80.01     | 2.41 | 6.64 |
| 160         | 9.4           | 14.1    | 0.3  | 146.54    | 38.01    | 13.02 | 58.64 | 1.4                                        | 2.41               | 4.35     | 12.38 | 1.4                                        | 25.01              | 76.14     | 2.43 | 6.33 |
| 180         | 9.4           | 14.1    | 0.3  | 113.61    | 38.26    | 13.11 | 55.46 | 1.4                                        | 2.24               | 4.23     | 12.81 | 1.4                                        | 26.66              | 69.22     | 2.43 | 6.48 |
| 200         | 9.4           | 14.1    | 0.3  | 100.12    | 38.11    | 13.01 | 53.55 | 1.4                                        | 2.31               | 4.18     | 12.46 | 1.4                                        | 26.27              | 76.35     | 2.39 | 6.86 |
| 220         | 9.4           | 14.1    | 0.3  | 83.11     | 38.88    | 12.89 | 56.46 | 1.4                                        | 2.37               | 4.40     | 12.59 | 1.4                                        | 26.11              | 73.99     | 2.46 | 6.64 |
| 240         | 9.4           | 14.1    | 0.3  | 66.12     | 37.01    | 12.89 | 54.15 | 1.4                                        | 2.22               | 4.37     | 12.33 | 1.4                                        | 27.21              | 61.09     | 2.41 | 6.34 |
| 260         | 9.4           | 14.1    | 0.3  | 61.03     | 37.66    | 13.01 | 57.13 | 1.4                                        | 2.39               | 4.31     | 12.61 | 1.4                                        | 26.89              | 66.01     | 2.40 | 6.39 |
| 280         | 9.4           | 14.1    | 0.3  | 52.55     | 38.11    | 13.11 | 59.11 | 1.4                                        | 2.26               | 4.42     | 12.49 | 1.4                                        | 26.01              | 50.1      | 2.66 | 6.48 |
| 300         | 9.4           | 14.1    | 0.3  | 42.09     | 36.98    | 12.91 | 57.21 | 1.4                                        | 2.33               | 4.29     | 12.56 | 1.4                                        | 26.03              | 60.98     | 2.54 | 6.39 |
| 320         | 9.4           | 14.1    | 0.3  | 35.11     | 37.35    | 13.13 | 53.64 | 1.4                                        | 2.20               | 4.38     | 12.68 | 1.4                                        | 26.09              | 71.25     | 2.31 | 6.34 |

|     |     |      |     |       |       |       |       |     |      |      |       |     |       |       |      |      |
|-----|-----|------|-----|-------|-------|-------|-------|-----|------|------|-------|-----|-------|-------|------|------|
| 340 | 9.3 | 14.1 | 0.3 | 11.78 | 38.22 | 13.01 | 55.94 | 1.4 | 2.40 | 4.39 | 12.44 | 1.4 | 26.55 | 84.12 | 2.55 | 6.32 |
| 360 | 9.3 | 14.1 | 0.3 | 4.01  | 40.55 | 13.01 | 52.45 | 1.4 | 2.38 | 4.24 | 12.37 | 1.4 | 28.34 | 97.11 | 2.45 | 6.42 |
| 380 | 9.3 | 14.1 | 0.3 | 6.98  | 40.01 | 12.98 | 54.38 | 1.4 | 2.32 | 4.27 | 12.63 | 1.4 | 27.06 | 72.57 | 2.54 | 6.45 |
| 400 | 9.3 | 14.1 | 0.3 | 5.01  | 40.21 | 13.19 | 51.85 | 1.4 | 2.35 | 4.41 | 12.44 | 1.4 | 27.87 | 83.14 | 2.77 | 6.35 |
| 420 | 9.3 | 14.1 | 0.3 | 5.21  | 40.22 | 12.95 | 49.71 | 1.4 | 2.37 | 4.35 | 12.37 | 1.4 | 28.09 | 80.14 | 2.77 | 6.45 |
| 440 | 9.3 | 14.1 | 0.3 | 5.95  | 39.01 | 12.98 | 46.78 | 1.4 | 2.37 | 4.32 | 12.63 | 1.4 | 28.20 | 88.13 | 2.70 | 6.82 |
| 460 | 9.3 | 14.1 | 0.3 | 5.36  | 38.79 | 12.20 | 47.64 | 1.4 | 2.38 | 4.33 | 12.50 | 1.4 | 29.03 | 80.32 | 2.66 | 6.34 |
| 480 | 9.3 | 14.1 | 0.3 | 10.98 | 41.28 | 12.98 | 45.46 | 1.4 | 2.38 | 4.33 | 12.60 | 1.4 | 28.82 | 79.89 | 2.65 | 6.45 |
| 500 | 9.3 | 14.1 | 0.3 | 8.01  | 40.11 | 12.84 | 43.68 | 1.4 | 2.38 | 4.35 | 12.48 | 1.4 | 28.03 | 77.11 | 2.65 | 6.13 |
| 520 | 9.3 | 14.1 | 0.3 | 6.01  | 39.49 | 12.87 | 41.45 | 1.4 | 2.38 | 4.37 | 12.66 | 1.4 | 28.13 | 62.11 | 2.76 | 6.64 |
| 540 | 9.3 | 14.1 | 0.3 | 4.02  | 40.70 | 12.76 | 42.63 | 1.4 | 2.36 | 4.37 | 12.39 | 1.4 | 27.72 | 53.01 | 2.76 | 6.31 |
| 560 | 9.3 | 14.1 | 0.3 | 3.98  | 42.16 | 12.56 | 41.57 | 1.4 | 2.38 | 4.32 | 12.57 | 1.4 | 27.12 | 58.23 | 2.70 | 6.29 |
| 580 | 9.3 | 14.1 | 0.3 | 2.03  | 40.99 | 12.67 | 41.17 | 1.4 | 2.38 | 4.36 | 12.45 | 1.4 | 27.19 | 48.21 | 2.70 | 6.09 |
| 600 | 9.3 | 14.1 | 0.3 | 1.04  | 40.14 | 12.97 | 41.36 | 1.4 | 2.38 | 4.39 | 12.52 | 1.4 | 28.23 | 41.32 | 2.65 | 6.41 |
| 620 | 9.3 | 14.1 | 0.3 | ≤0.5  | 41.11 | 12.45 | 40.45 | 1.4 | 2.37 | 4.39 | 12.58 | 1.4 | 28.21 | 40.11 | 2.66 | 6.19 |
| 640 | 9.3 | 14.1 | 0.3 | ≤0.5  | 42.11 | 12.63 | 40.69 | 1.4 | 2.38 | 4.39 | 12.57 | 1.4 | 28.01 | 41.25 | 2.67 | 6.12 |
| 660 | 9.3 | 14.1 | 0.3 | ≤0.5  | 42.16 | 12.84 | 40.54 | 1.4 | 2.37 | 4.39 | 12.56 | 1.4 | 28.11 | 40.14 | 2.62 | 6.28 |
| 680 | 9.3 | 14.1 | 0.3 | ≤0.5  | 42.11 | 12.51 | 39.33 | 1.4 | 2.38 | 4.39 | 12.53 | 1.4 | 28.11 | 39.14 | 2.62 | 6.35 |
| 700 | 9.3 | 14.1 | 0.3 | ≤0.5  | 42.12 | 12.63 | 40.97 | 1.4 | 2.38 | 4.39 | 12.50 | 1.4 | 28.52 | 36.94 | 2.64 | 6.14 |
| 720 | 9.3 | 14.1 | 0.3 | ≤0.5  | 42.76 | 12.58 | 40.34 | 1.4 | 2.38 | 4.39 | 12.50 | 1.4 | 28.01 | 33.25 | 2.63 | 6.54 |

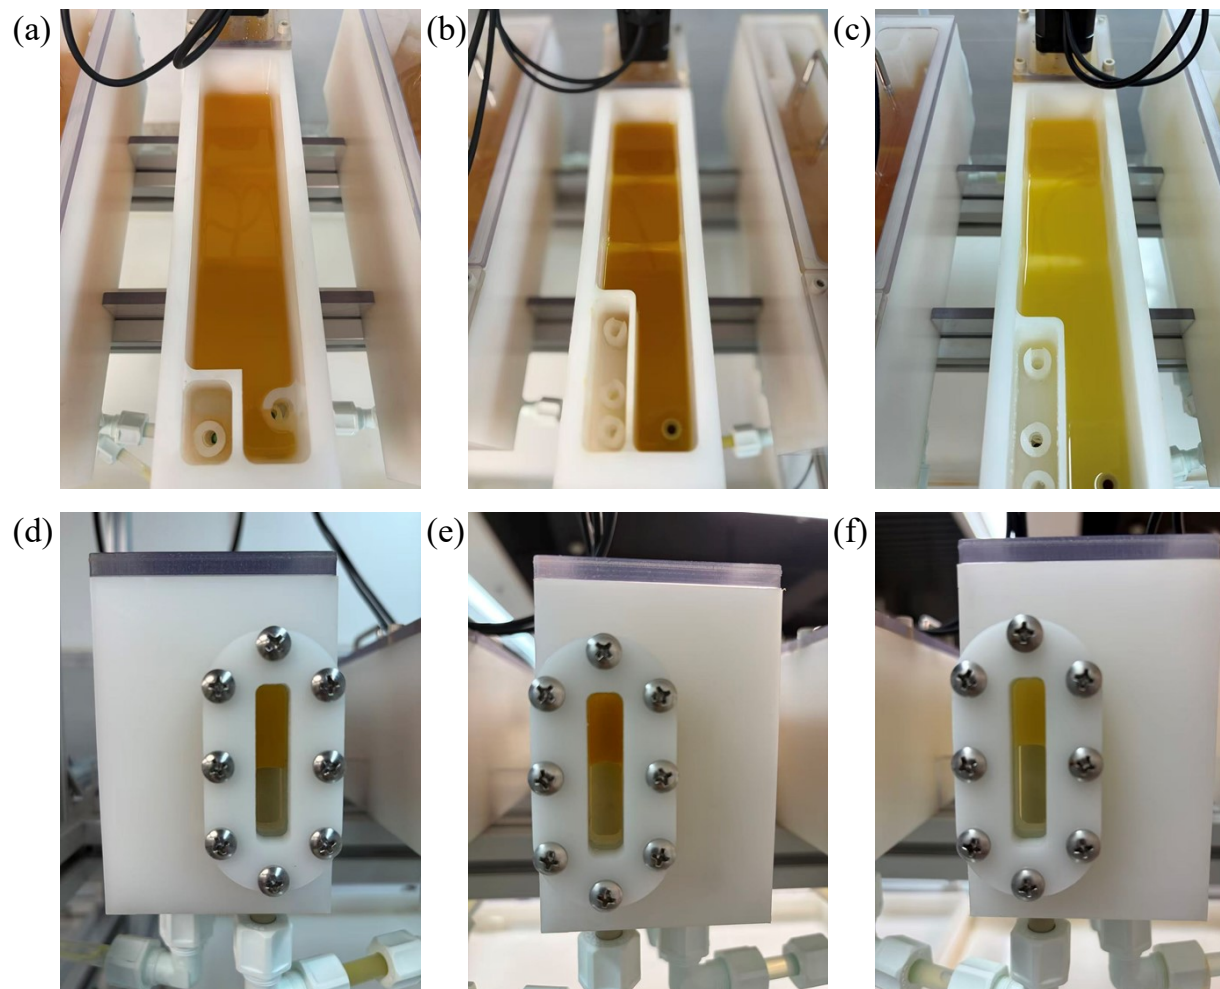

**Fig.S3.** Schematics of the mixed settlers for (a) extraction, (b) scrubbing, and (c) stripping stages; Phase interfaces observed during the (d) extraction, (e) scrubbing, and (f) stripping stages, respectively.

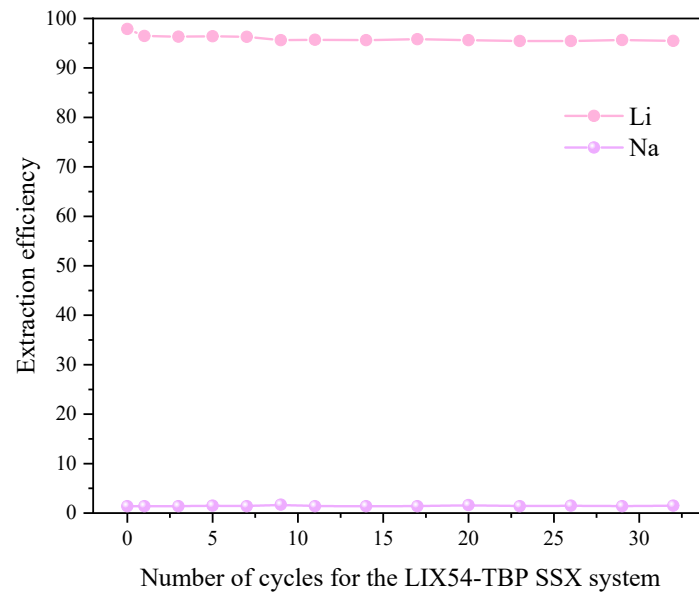

**Fig.S4.** Cycling extraction performance for the LIX54-TBP SSX system

**Table S13.** Cost accounting table (Exchange rate: RMB to USD and quotations of industrial raw materials are as of February, 2026)

| Items    | Unit price                           | Impurity co-extraction cost         |                                      | Li extraction cost                  |                                      | Li precipitation                    |                                      |        |
|----------|--------------------------------------|-------------------------------------|--------------------------------------|-------------------------------------|--------------------------------------|-------------------------------------|--------------------------------------|--------|
|          | \$/t                                 | t/t Li <sub>2</sub> CO <sub>3</sub> | \$/t Li <sub>2</sub> CO <sub>3</sub> | t/t Li <sub>2</sub> CO <sub>3</sub> | \$/t Li <sub>2</sub> CO <sub>3</sub> | t/t Li <sub>2</sub> CO <sub>3</sub> | \$/t Li <sub>2</sub> CO <sub>3</sub> |        |
| Regents  | NaOH (32%)                           | 125.74                              | 0.47                                 | 59.10                               | 4.50                                 | 565.93                              | -                                    | -      |
|          | H <sub>2</sub> SO <sub>4</sub> (98%) | 34.23                               | 0.2                                  | 6.84                                | 1.41                                 | 48.16                               | -                                    | -      |
|          | D2EHPA                               | 4881.45                             | 2.7×10 <sup>-3</sup>                 | 13.18                               | -                                    | -                                   | -                                    | -      |
|          | LIX54/TBP                            | 29288.70                            | -                                    | -                                   | 3.6×10 <sup>-3</sup>                 | 105.44                              | -                                    | -      |
|          | Activated carbon                     | 1117.69                             | -                                    | -                                   | 0.01                                 | 11.18                               | -                                    | -      |
|          | Activated carbon treatment           | 181.63                              | -                                    | -                                   | 0.01                                 | 1.82                                | -                                    | -      |
|          | Na <sub>2</sub> CO <sub>3</sub>      | 276.54                              | -                                    | -                                   | -                                    | -                                   | 1.58                                 | 436.93 |
| Cost     |                                      |                                     | 79.12                                |                                     | 732.53                               |                                     | 436.93                               |        |
| Products | Name                                 | Unit price (\$/t)                   | Cost(\$/t)                           | Yield (t)                           |                                      | Profit (\$)                         |                                      |        |
|          | Li <sub>2</sub> CO <sub>3</sub>      | 21000                               | 1248.58                              | 1                                   |                                      | 19751.42                            |                                      |        |

Note: The cost accounting presented does not account for depreciation, energy consumption, or labor costs.
